# Supplementary material for: Identification of Cytospora Species Isolated from Branch Canker Diseases of Woody Plants in Tibet, China
Source: MDPI journal article supplement (doi:10.3390/f15010121), 2024-01-08
Supplement: s1 [file s1]

**Supplementary Table S1.** GenBank accession numbers used in the phylogenetic analyses.

| Species                           | Strain                      | GenBank accession numbers |            |             |             |             |
|-----------------------------------|-----------------------------|---------------------------|------------|-------------|-------------|-------------|
|                                   |                             | ITS                       | <i>act</i> | <i>rpb2</i> | <i>tef1</i> | <i>tub2</i> |
| <i>Cytospora ailanthicola</i>     | CFCC 89970                  | MH933618                  | MH933526   | MH933592    | MH933494    | MH933565    |
| <i>Cytospora albodisca</i>        | CFCC 53161                  | MW418406                  | MW422899   | MW422909    | MW422921    | MW422933    |
| <i>Cytospora albodisca</i>        | CFCC 54373                  | MW418407                  | MW422900   | MW422910    | MW422922    | MW422934    |
| <i>Cytospora alba</i>             | CFCC 55462 <sup>T</sup>     | NR182387                  | OK303457   | OK303516    | OK303577    | OK303644    |
| <i>Cytospora alba</i>             | CFCC 55463                  | MZ702596                  | OK303458   | OK303517    | OK303578    | OK303645    |
| <i>Cytospora ampulliformis</i>    | MFLUCC 16-0583 <sup>T</sup> | KY417726                  | KY417692   | KY417794    | NA          | NA          |
| <i>Cytospora ampulliformis</i>    | MFLUCC 16-0629              | KY417727                  | KY417693   | KY417795    | NA          | NA          |
| <i>Cytospora amygdali</i>         | CBS 144233 <sup>T</sup>     | MG971853                  | MG972002   | NA          | MG971659    | NA          |
| <i>Cytospora atrocirrhatta</i>    | CFCC 89615                  | KR045618                  | KF498673   | KU710946    | KP310858    | KR045659    |
| <i>Cytospora atrocirrhatta</i>    | CFCC 89616                  | KR045619                  | KF498674   | KU710947    | KP310859    | KR045660    |
| <i>Cytospora beilinensis</i>      | CFCC 50493 <sup>T</sup>     | MH933619                  | MH933527   | NA          | MH933495    | MH933561    |
| <i>Cytospora beilinensis</i>      | CFCC 50494                  | MH933620                  | MH933528   | NA          | MH933496    | MH933562    |
| <i>Cytospora berberidis</i>       | CFCC 89927 <sup>T</sup>     | KR045620                  | KU710990   | KU710948    | KU710913    | KR045661    |
| <i>Cytospora berberidis</i>       | CFCC 89933                  | KR045621                  | KU710991   | KU710949    | KU710914    | KR045662    |
| <i>Cytospora bungeana</i>         | CFCC 50495 <sup>T</sup>     | MH933621                  | MH933529   | MH933593    | MH933497    | MH933563    |
| <i>Cytospora bungeana</i>         | CFCC 50496                  | MH933622                  | MH933530   | MH933594    | MH933498    | MH933564    |
| <i>Cytospora californica</i>      | CBS 144234 <sup>T</sup>     | MG971935                  | MG972083   | NA          | MG971645    | NA          |
| <i>Cytospora carbonacea</i>       | CFCC 89947                  | KR045622                  | KP310842   | KU710950    | KP310855    | KP310825    |
| <i>Cytospora carpobroti</i>       | CMW48981 <sup>T</sup>       | MH382812                  | NA         | NA          | MH411212    | MH411207    |
| <i>Cytospora celtidicola</i>      | CFCC 50497 <sup>T</sup>     | MH933623                  | MH933531   | MH933595    | MH933499    | MH933566    |
| <i>Cytospora celtidicola</i>      | CFCC 50498                  | MH933624                  | MH933532   | MH933596    | MH933500    | MH933567    |
| <i>Cytospora centrivillosa</i>    | MFLUCC 16-1206 <sup>T</sup> | MF190122                  | NA         | MF377600    | NA          | NA          |
| <i>Cytospora centrivillosa</i>    | MFLUCC 17-1660              | MF190123                  | NA         | MF377601    | NA          | NA          |
| <i>Cytospora ceratosperma</i>     | CFCC 89624                  | KR045645                  | NA         | KU710976    | KP310860    | KR045686    |
| <i>Cytospora ceratosperma</i>     | CFCC 89625                  | KR045646                  | NA         | KU710977    | KP310861    | KR045687    |
| <i>Cytospora ceratospermopsis</i> | CFCC 89626 <sup>T</sup>     | KR045647                  | KU711011   | KU710978    | KU710934    | KR045688    |
| <i>Cytospora ceratospermopsis</i> | CFCC 89627                  | KR045648                  | KU711012   | KU710979    | KU710935    | KR045689    |
| <i>Cytospora chrysosperma</i>     | CFCC 89629                  | KF765673                  | NA         | KF765705    | NA          | NA          |

| Species                          | Strain                      | GenBank accession numbers |            |             |             |             |
|----------------------------------|-----------------------------|---------------------------|------------|-------------|-------------|-------------|
|                                  |                             | ITS                       | <i>act</i> | <i>rpb2</i> | <i>tef1</i> | <i>tub2</i> |
| <i>Cytospora chrysosperma</i>    | CFCC 89981                  | MH933625                  | MH933533   | MH933597    | MH933501    | MH933568    |
| <i>Cytospora chrysosperma</i>    | CFCC 89982                  | KP281261                  | KP310835   | NA          | KP310848    | KP310818    |
| <i>Cytospora cinnamomea</i>      | CFCC 53178 <sup>T</sup>     | MK673054                  | MK673024   | NA          | NA          | MK672970    |
| <i>Cytospora coryli</i>          | CFCC 53162 <sup>T</sup>     | MN854450                  | NA         | MN850751    | MN850758    | MN861120    |
| <i>Cytospora corylina</i>        | CFCC 54684 <sup>T</sup>     | MW839861                  | MW815937   | MW815951    | MW815886    | MW883969    |
| <i>Cytospora corylina</i>        | CFCC 54685                  | MW839862                  | MW815938   | MW815952    | MW815887    | MW883970    |
| <i>Cytospora cotini</i>          | MFLUCC 14-1050 <sup>T</sup> | KX430142                  | NA         | KX430144    | NA          | NA          |
| <i>Cytospora cotoneastricola</i> | CF 20197027                 | MK673072                  | MK673042   | MK673012    | MK672958    | MK672988    |
| <i>Cytospora cotoneastricola</i> | CF 20197028                 | MK673073                  | MK673043   | MK673013    | MK672959    | MK672989    |
| <i>Cytospora curvata</i>         | MFLUCC 15-0865 <sup>T</sup> | KY417728                  | KY417694   | NA          | NA          | NA          |
| <i>Cytospora curvispora</i>      | CFCC 54000 <sup>T</sup>     | MW839851                  | MW815931   | MW815945    | MW815880    | MW883963    |
| <i>Cytospora curvispora</i>      | CFCC 54001                  | MW839853                  | MW815932   | MW815946    | MW815881    | MW883964    |
| <i>Cytospora davidiana</i>       | CXY 1350 <sup>T</sup>       | KM034870                  | NA         | NA          | NA          | NA          |
| <i>Cytospora diopuiensis</i>     | CFCC 55479                  | OQ344753                  | OQ410625   | OQ398735    | OQ398762    | OQ398791    |
| <i>Cytospora diopuiensis</i>     | CFCC 55527                  | OQ344754                  | OQ410626   | OQ398736    | OQ398763    | OQ398792    |
| <i>Cytospora discotoma</i>       | CFCC 53137 <sup>T</sup>     | MW418404                  | MW422897   | MW422907    | MW422919    | MW422931    |
| <i>Cytospora discotoma</i>       | CFCC 54368                  | MW418405                  | MW422898   | MW422908    | MW422920    | MW422932    |
| <i>Cytospora donetzica</i>       | MFLUCC 15-0864              | KY417729                  | KY417695   | KY417797    | NA          | NA          |
| <i>Cytospora donetzica</i>       | MFLUCC 16-0574 <sup>T</sup> | KY417731                  | KY417697   | KY417799    | NA          | NA          |
| <i>Cytospora donglingensis</i>   | CFCC 53159 <sup>T</sup>     | MW418412                  | MW422903   | MW422915    | MW422927    | MW422939    |
| <i>Cytospora donglingensis</i>   | CFCC 53160                  | MW418414                  | MW422905   | MW422917    | MW422929    | MW422941    |
| <i>Cytospora elaeagni</i>        | CFCC 89632                  | KR045626                  | KU710995   | KU710955    | KU710918    | KR045667    |
| <i>Cytospora elaeagni</i>        | CFCC 89633                  | KF765677                  | KU710996   | KU710956    | KU710919    | KR045668    |
| <i>Cytospora elaeagnicola</i>    | CFCC 52882 <sup>T</sup>     | MK732341                  | MK732344   | MK732347    | NA          | NA          |
| <i>Cytospora elaeagnicola</i>    | CFCC 52883                  | MK732342                  | MK732345   | MK732348    | NA          | NA          |
| <i>Cytospora erumpens</i>        | CFCC 50022                  | MH933627                  | MH933534   | NA          | MH933502    | MH933569    |
| <i>Cytospora erumpens</i>        | CFCC 53163                  | MK673059                  | MK673029   | MK673000    | MK672948    | MK672975    |
| <i>Cytospora eucalypti</i>       | CBS 144241                  | MG971907                  | MG972056   | NA          | MG971617    | NA          |
| <i>Cytospora euonymicola</i>     | CFCC 50499 <sup>T</sup>     | MH933628                  | MH933535   | MH933598    | MH933503    | MH933570    |

| Species                         | Strain                      | GenBank accession numbers |            |             |             |             |
|---------------------------------|-----------------------------|---------------------------|------------|-------------|-------------|-------------|
|                                 |                             | ITS                       | <i>act</i> | <i>rpb2</i> | <i>tef1</i> | <i>tub2</i> |
| <i>Cytospora euonymicola</i>    | CFCC 50500                  | MH933629                  | MH933536   | MH933599    | MH933504    | MH933571    |
| <i>Cytospora euonymina</i>      | CFCC 89993 <sup>T</sup>     | MH933630                  | MH933537   | MH933600    | MH933505    | MH933590    |
| <i>Cytospora euonymina</i>      | CFCC 89999                  | MH933631                  | MH933538   | MH933601    | MH933506    | MH933591    |
| <i>Cytospora fraxinigena</i>    | MFLU 17-0880 <sup>T</sup>   | NR154859                  | NA         | NA          | NA          | NA          |
| <i>Cytospora fugax</i>          | CXY 1371                    | KM034852                  | NA         | NA          | NA          | KM034891    |
| <i>Cytospora fugax</i>          | CXY 1381                    | KM034853                  | NA         | NA          | NA          | KM034890    |
| <i>Cytospora fusispora</i>      | NFCCI 4372                  | MN227694                  | NA         | NA          | NA          | NA          |
| <i>Cytospora galegicola</i>     | MFLUCC 18-1199 <sup>T</sup> | MK912128                  | MN685810   | MN685820    | NA          | NA          |
| <i>Cytospora gigalocus</i>      | CFCC 89620 <sup>T</sup>     | KR045628                  | KU710997   | KU710957    | KU710920    | KR045669    |
| <i>Cytospora gigalocus</i>      | CFCC 89621                  | KR045629                  | KU710998   | KU710958    | KU710921    | KR045670    |
| <i>Cytospora gigaspora</i>      | CFCC 50014                  | KR045630                  | KU710999   | KU710959    | KU710922    | KR045671    |
| <i>Cytospora gigaspora</i>      | CFCC 89634 <sup>T</sup>     | KF765671                  | KU711000   | KU710960    | KU710923    | KR045672    |
| <i>Cytospora globosa</i>        | MFLU 16-2054 <sup>T</sup>   | MT177935                  | NA         | MT432212    | MT454016    | NA          |
| <i>Cytospora granati</i>        | CBS 144237 <sup>T</sup>     | MG971799                  | MG971949   | NA          | MG971514    | NA          |
| <i>Cytospora haidianensis</i>   | CFCC 54056                  | MT360041                  | MT363978   | MT363987    | MT363997    | MT364007    |
| <i>Cytospora haidianensis</i>   | CFCC 54057 <sup>T</sup>     | MT360042                  | MT363979   | MT363988    | MT363998    | MT364008    |
| <i>Cytospora hippophaës</i>     | CFCC 89639                  | KR045632                  | KU711001   | KU710961    | KU710924    | KR045673    |
| <i>Cytospora hippophaës</i>     | CFCC 89640                  | KF765682                  | KF765730   | KU710962    | KP310865    | KR045674    |
| <i>Cytospora japonica</i>       | CFCC 89956                  | KR045624                  | KU710993   | KU710953    | KU710916    | KR045665    |
| <i>Cytospora japonica</i>       | CFCC 89960                  | KR045625                  | KU710994   | KU710954    | KU710917    | KR045666    |
| <i>Cytospora joaquinensis</i>   | CBS 144235                  | MG971895                  | MG972044   | NA          | MG971605    | NA          |
| <i>Cytospora junipericola</i>   | MFLU 17-0882 <sup>T</sup>   | MF190125                  | NA         | NA          | MF377580    | NA          |
| <i>Cytospora juniperina</i>     | CFCC 50501 <sup>T</sup>     | MH933632                  | MH933539   | MH933602    | MH933507    | NA          |
| <i>Cytospora juniperina</i>     | CFCC 50502                  | MH933633                  | MH933540   | MH933603    | MH933508    | MH933572    |
| <i>Cytospora kantschavelii</i>  | CXY 1383                    | KM034867                  | NA         | NA          | NA          | NA          |
| <i>Cytospora kuanchengensis</i> | CFCC 52464 <sup>T</sup>     | MK432616                  | MK442940   | MK578076    | NA          | NA          |
| <i>Cytospora kuanchengensis</i> | CFCC 52465                  | MK432617                  | MK442941   | MK578077    | NA          | NA          |
| <i>Cytospora leucosperma</i>    | CFCC 89622                  | KR045616                  | KU710988   | KU710944    | KU710911    | KR045657    |

| Species                            | Strain                      | GenBank accession numbers |            |             |             |             |
|------------------------------------|-----------------------------|---------------------------|------------|-------------|-------------|-------------|
|                                    |                             | ITS                       | <i>act</i> | <i>rpb2</i> | <i>tef1</i> | <i>tub2</i> |
| <i>Cytospora leucosperma</i>       | CFCC 89894                  | KR045617                  | KU710989   | KU710945    | KU710912    | KR045658    |
| <i>Cytospora longispora</i>        | CBS 144236 <sup>T</sup>     | MG971905                  | MG972054   | NA          | MG971615    | NA          |
| <i>Cytospora longistiolata</i>     | MFLUCC 16-0628              | KY417734                  | KY417700   | KY417802    | NA          | NA          |
| <i>Cytospora lumnitzericola</i>    | MFLUCC 17-0508 <sup>T</sup> | MG975778                  | MH253457   | MH253461    | NA          | NA          |
| <i>Cytospora mali</i>              | CFCC 50028                  | MH933641                  | MH933548   | MH933606    | MH933513    | MH933577    |
| <i>Cytospora mali</i>              | CFCC 50029                  | MH933642                  | MH933549   | MH933607    | MH933514    | MH933578    |
| <i>Cytospora mali-spectabilis</i>  | CFCC 53181 <sup>T</sup>     | MK673066                  | MK673036   | MK673006    | MK672953    | MK672982    |
| <i>Cytospora melnikii</i>          | CFCC 89984                  | MH933644                  | MH933551   | MH933609    | MH933515    | MH933580    |
| <i>Cytospora myrtagena</i>         | CFCC 52454                  | MK432614                  | MK442938   | MK578074    | NA          | NA          |
| <i>Cytospora myrtagena</i>         | CFCC 52455                  | MK432615                  | MK442939   | MK578075    | NA          | NA          |
| <i>Cytospora nivea</i>             | MFLUCC 15-0860              | KY417737                  | KY417703   | KY417805    | NA          | NA          |
| <i>Cytospora nivea</i>             | CFCC 89641                  | KF765683                  | KU711006   | KU710967    | KU710929    | KR045679    |
| <i>Cytospora notastroma</i>        | NE_TFR5                     | JX438632                  | NA         | NA          | JX438543    | NA          |
| <i>Cytospora notastroma</i>        | NE_TFR8                     | JX438633                  | NA         | NA          | JX438542    | NA          |
| <i>Cytospora ochracea</i>          | CFCC 53164 <sup>T</sup>     | MK673060                  | MK673030   | MK673001    | MK672949    | MK672976    |
| <i>Cytospora oleicola</i>          | CBS 144248 <sup>T</sup>     | MG971944                  | MG972098   | NA          | MG971660    | NA          |
| <i>Cytospora olivacea</i>          | CFCC 53174                  | MK673058                  | MK673028   | MK672999    | NA          | MK672974    |
| <i>Cytospora olivacea</i>          | CFCC 53175                  | MK673062                  | MK673032   | MK673003    | NA          | MK672978    |
| <i>Cytospora palm</i>              | CXY 1276                    | JN402990                  | NA         | NA          | KJ781296    | NA          |
| <i>Cytospora palm</i>              | CXY 1280 <sup>T</sup>       | JN411939                  | NA         | NA          | KJ781297    | NA          |
| <i>Cytospora paracinnamomea</i>    | CFCC 55453 <sup>T</sup>     | MZ702594                  | OK303456   | OK303515    | OK303576    | OK303643    |
| <i>Cytospora paracinnamomea</i>    | CFCC 55455 <sup>T</sup>     | MZ702598                  | OK303460   | OK303519    | OK303580    | OK303647    |
| <i>Cytospora parakantschavelii</i> | MFLUCC 15-0857 <sup>T</sup> | KY417738                  | KY417704   | KY417806    | NA          | NA          |
| <i>Cytospora parapistaciae</i>     | CBS 144506 <sup>T</sup>     | MG971804                  | MG971954   | NA          | MG971519    | NA          |
| <i>Cytospora paraplurivora</i>     | FDS-439                     | OL640182                  | OL631586   | NA          | OL631589    | NA          |
| <i>Cytospora paraplurivora</i>     | FDS-564 <sup>T</sup>        | OL640183                  | OL631587   | NA          | OL631590    | NA          |
| <i>Cytospora parasitica</i>        | CFCC 53173                  | MK673070                  | MK673040   | MK673010    | MK672957    | MK672986    |

| Species                          | Strain                      | GenBank accession numbers |            |             |             |             |
|----------------------------------|-----------------------------|---------------------------|------------|-------------|-------------|-------------|
|                                  |                             | ITS                       | <i>act</i> | <i>rpb2</i> | <i>tef1</i> | <i>tub2</i> |
| <i>Cytospora paratranslucens</i> | MFLUCC 15-0506 <sup>T</sup> | KY417741                  | KY417707   | KY417809    | NA          | NA          |
| <i>Cytospora paratranslucens</i> | MFLUCC 16-0627              | KY417742                  | KY417708   | KY417810    | NA          | NA          |
| <i>Cytospora phialidica</i>      | MFLUCC 17-2498              | MT177932                  | NA         | MT432209    | MT454014    | NA          |
| <i>Cytospora piceae</i>          | CFCC 52841 <sup>T</sup>     | MH820398                  | MH820406   | MH820395    | MH820402    | MH820387    |
| <i>Cytospora piceae</i>          | CFCC 52842                  | MH820399                  | MH820407   | MH820396    | MH820403    | MH820388    |
| <i>Cytospora pingbianensis</i>   | MFLUCC 18-1204 <sup>T</sup> | MK912135                  | MN685817   | MN685826    | NA          | NA          |
| <i>Cytospora pistaciae</i>       | CBS 144238 <sup>T</sup>     | MG971802                  | MG971952   | NA          | MG971517    | NA          |
| <i>Cytospora platycladi</i>      | CFCC 50504 <sup>T</sup>     | MH933645                  | MH933552   | MH933610    | MH933516    | MH933581    |
| <i>Cytospora platycladi</i>      | CFCC 50505                  | MH933646                  | MH933553   | MH933611    | MH933517    | MH933582    |
| <i>Cytospora platycladicola</i>  | CFCC 50038 <sup>T</sup>     | KT222840                  | MH933555   | MH933613    | MH933519    | MH933584    |
| <i>Cytospora platycladicola</i>  | CFCC 50039                  | KR045642                  | KU711008   | KU710973    | KU710931    | KR045683    |
| <i>Cytospora plurivora</i>       | CBS 144239 <sup>T</sup>     | MG971861                  | MG972010   | NA          | MG971572    | NA          |
| <i>Cytospora populi</i>          | CFCC 55472 <sup>T</sup>     | MZ702609                  | OK303471   | OK303530    | OK303591    | OK303658    |
| <i>Cytospora populi</i>          | CFCC 55473                  | MZ702610                  | OK303472   | OK303531    | OK303592    | OK303659    |
| <i>Cytospora populicola</i>      | CBS 144240                  | MG971891                  | MG972040   | NA          | MG971601    | NA          |
| <i>Cytospora populina</i>        | CFCC 89644 <sup>T</sup>     | KF765686                  | KU711007   | KU710969    | KU710930    | KR045681    |
| <i>Cytospora populinopsis</i>    | CFCC 50032 <sup>T</sup>     | MH933648                  | MH933556   | MH933614    | MH933520    | MH933585    |
| <i>Cytospora populinopsis</i>    | CFCC 50033                  | MH933649                  | MH933557   | MH933615    | MH933521    | MH933586    |
| <i>Cytospora predappioensis</i>  | MFLUCC 17-2458 <sup>T</sup> | MG873484                  | NA         | NA          | NA          | NA          |
| <i>Cytospora predappioensis</i>  | MFLU 17-0327                | MH253451                  | MH253449   | MH253450    | NA          | NA          |
| <i>Cytospora prunicola</i>       | MFLU 17-0995 <sup>T</sup>   | MG742350                  | MG742353   | MG742352    | NA          | NA          |
| <i>Cytospora pruni-mume</i>      | CFCC 53179                  | MK673057                  | MK673027   | NA          | MK672947    | MK672973    |
| <i>Cytospora pruni-mume</i>      | CFCC 53180 <sup>T</sup>     | MK673067                  | MK673037   | MK673007    | MK672954    | MK672983    |
| <i>Cytospora pruinopsis</i>      | CFCC 50034 <sup>T</sup>     | KP281259                  | KP310836   | KU710970    | KP310849    | KP310819    |
| <i>Cytospora pruinopsis</i>      | CFCC 53153                  | MN854451                  | MN850763   | MN850752    | MN850759    | MN861121    |
| <i>Cytospora pruinosa</i>        | CFCC 50036                  | KP310800                  | KP310832   | NA          | KP310845    | KP310815    |
| <i>Cytospora pruinosa</i>        | CFCC 50037                  | MH933650                  | MH933558   | NA          | MH933522    | MH933589    |

| Species                       | Strain                      | GenBank accession numbers |            |             |             |             |
|-------------------------------|-----------------------------|---------------------------|------------|-------------|-------------|-------------|
|                               |                             | ITS                       | <i>act</i> | <i>rpb2</i> | <i>tef1</i> | <i>tub2</i> |
| <i>Cytospora pubescentis</i>  | MFLUCC 18-1201 <sup>T</sup> | MK912130                  | MN685812   | MN685821    | NA          | NA          |
| <i>Cytospora punicae</i>      | CBS 144244                  | MG971943                  | MG972091   | NA          | MG971654    | NA          |
| <i>Cytospora quercicola</i>   | MFLU 17-0881                | MF190128                  | NA         | NA          | NA          | NA          |
| <i>Cytospora ribis</i>        | CFCC 50026                  | KP281267                  | KP310843   | KU710972    | KP310856    | KP310826    |
| <i>Cytospora ribis</i>        | CFCC 50027                  | KP281268                  | KP310844   | NA          | KP310857    | KP310827    |
| <i>Cytospora rosae</i>        | MFLU 17-0885                | MF190131                  | NA         | NA          | NA          | NA          |
| <i>Cytospora rosicola</i>     | CF 20197024 <sup>T</sup>    | MK673079                  | MK673049   | MK673019    | MK672965    | MK672995    |
| <i>Cytospora rosigena</i>     | MFLUCC 18-0921 <sup>T</sup> | MN879872                  | NA         | NA          | NA          | NA          |
| <i>Cytospora rostrata</i>     | CFCC 89909                  | KR045643                  | KU711009   | KU710974    | KU710932    | KR045684    |
| <i>Cytospora rostrata</i>     | CFCC 89910                  | KR045644                  | KU711010   | KU710975    | KU710933    | NA          |
| <i>Cytospora rusanovii</i>    | MFLUCC 15-0853              | KY417743                  | KY417709   | KY417811    | NA          | NA          |
| <i>Cytospora rusanovii</i>    | MFLUCC 15-0854 <sup>T</sup> | KY417744                  | KY417710   | KY417812    | NA          | NA          |
| <i>Cytospora salicacearum</i> | MFLUCC 15-0509              | KY417746                  | KY417712   | KY417814    | NA          | NA          |
| <i>Cytospora salicacearum</i> | MFLUCC 15-0861              | KY417745                  | KY417711   | KY417813    | NA          | NA          |
| <i>Cytospora salicicola</i>   | MFLUCC 14-1052 <sup>T</sup> | KU982636                  | KU982637   | NA          | NA          | NA          |
| <i>Cytospora salicicola</i>   | MFLUCC 15-0866              | KY417749                  | KY417715   | KY417817    | NA          | NA          |
| <i>Cytospora salicina</i>     | MFLUCC 15-0862              | KY417750                  | KY417716   | KY417818    | NA          | NA          |
| <i>Cytospora salicina</i>     | MFLUCC 16-0637              | KY417751                  | KY417717   | KY417819    | NA          | NA          |
| <i>Cytospora schulzeri</i>    | CFCC 50042                  | KR045650                  | KU711014   | KU710981    | KU710937    | KR045691    |
| <i>Cytospora sibiraeae</i>    | CFCC 50045 <sup>T</sup>     | KR045651                  | KU711015   | KU710982    | KU710938    | KR045692    |
| <i>Cytospora sibiraeae</i>    | CFCC 50046                  | KR045652                  | KU711016   | KU710983    | KU710939    | KR045693    |
| <i>Cytospora sophorae</i>     | CFCC 50047                  | KR045653                  | KU711017   | KU710984    | KU710940    | KR045694    |
| <i>Cytospora sophorae</i>     | CFCC 89598                  | KR045654                  | KU711018   | KU710985    | KU710941    | KR045695    |

| Species                       | Strain                      | GenBank accession numbers |            |             |             |             |
|-------------------------------|-----------------------------|---------------------------|------------|-------------|-------------|-------------|
|                               |                             | ITS                       | <i>act</i> | <i>rpb2</i> | <i>tef1</i> | <i>tub2</i> |
| <i>Cytospora sophoricola</i>  | CFCC 89596                  | KR045656                  | KU711020   | KU710987    | KU710943    | KR045697    |
| <i>Cytospora sophoricola</i>  | CFCC 89595 <sup>T</sup>     | KR045655                  | KU711019   | KU710986    | KU710942    | KR045696    |
| <i>Cytospora sophoriopsis</i> | CFCC 55469                  | MZ702583                  | OK303445   | OK303504    | OK303565    | OK303632    |
| <i>Cytospora sophoriopsis</i> | CFCC 89600                  | KR045623                  | KU710992   | KU710951    | KU710915    | KP310817    |
| <i>Cytospora sorbi</i>        | MFLUCC 16-0631 <sup>T</sup> | KY417752                  | KY417718   | KY417820    | NA          | NA          |
| <i>Cytospora sorbicola</i>    | MFLUCC 16-0584 <sup>T</sup> | KY417755                  | KY417721   | KY417823    | NA          | NA          |
| <i>Cytospora sorbicola</i>    | MFLUCC 16-0633              | KY417758                  | KY417724   | KY417826    | NA          | NA          |
| <i>Cytospora sorbina</i>      | CF 20197660 <sup>T</sup>    | MK673052                  | MK673022   | NA          | MK672943    | MK672968    |
| <i>Cytospora spiraeae</i>     | CFCC 50049 <sup>T</sup>     | MG707859                  | MG708196   | MG708199    | NA          | NA          |
| <i>Cytospora spiraeae</i>     | CFCC 50050                  | MG707860                  | MG708197   | MG708200    | NA          | NA          |
| <i>Cytospora spiraeicola</i>  | CFCC 53138 <sup>T</sup>     | MN854448                  | NA         | MN850749    | MN850756    | MN861118    |
| <i>Cytospora spiraeicola</i>  | CFCC 53139                  | MN854449                  | NA         | MN850750    | MN850757    | MN861119    |
| <i>Cytospora tamaricicola</i> | CFCC 50507                  | MH933651                  | MH933559   | MH933616    | MH933525    | MH933587    |
| <i>Cytospora tamaricicola</i> | CFCC 50508 <sup>T</sup>     | MH933652                  | MH933560   | MH933617    | MH933523    | MH933588    |
| <i>Cytospora tanaitica</i>    | MFLUCC 14-1057 <sup>T</sup> | KT459411                  | KT459413   | NA          | NA          | NA          |
| <i>Cytospora thailandica</i>  | MFLUCC 17-0262 <sup>T</sup> | MG975776                  | MH253459   | MH253463    | NA          | NA          |
| <i>Cytospora thailandica</i>  | MFLUCC 17-0263 <sup>T</sup> | MG975777                  | MH253460   | MH253464    | NA          | NA          |
| <i>Cytospora tibetensis</i>   | CF 20197026                 | MK673076                  | MK673046   | MK673016    | MK672962    | MK672992    |
| <i>Cytospora tibetensis</i>   | CF 20197029                 | MK673077                  | MK673047   | MK673017    | MK672963    | MK672993    |
| <i>Cytospora tibouchinae</i>  | CPC 26333 <sup>T</sup>      | KX228284                  | NA         | NA          | NA          | NA          |
| <i>Cytospora translucens</i>  | CXY 1351                    | KM034874                  | NA         | NA          | NA          | KM034895    |
| <i>Cytospora translucens</i>  | CXY 1359                    | KM034871                  | NA         | NA          | NA          | KM034894    |
| <i>Cytospora ulmi</i>         | MFLUCC 15-0863 <sup>T</sup> | KY417759                  | NA         | NA          | NA          | NA          |
| <i>Cytospora verrucosa</i>    | CFCC 53157 <sup>T</sup>     | MW418408                  | NA         | MW422911    | MW422923    | MW422935    |
| <i>Cytospora verrucosa</i>    | CFCC 53158                  | MW418410                  | MW422901   | MW422913    | MW422925    | MW422937    |
| <i>Cytospora vinacea</i>      | CBS 141585 <sup>T</sup>     | KX256256                  | NA         | NA          | KX256277    | KX256235    |
| <i>Cytospora viridistroma</i> | CBS 202.36 <sup>T</sup>     | MN172408                  | NA         | NA          | MN271853    | NA          |
| <i>Cytospora viticola</i>     | Cyt2                        | KX256238                  | NA         | NA          | KX256259    | KX256217    |

| Species                        | Strain                      | GenBank accession numbers |            |             |             |             |
|--------------------------------|-----------------------------|---------------------------|------------|-------------|-------------|-------------|
|                                |                             | ITS                       | <i>act</i> | <i>rpb2</i> | <i>tef1</i> | <i>tub2</i> |
| <i>Cytospora viticola</i>      | CBS 141586 <sup>T</sup>     | KX256239                  | NA         | NA          | KX256260    | KX256218    |
| <i>Cytospora xinjiangensis</i> | CFCC 53182                  | MK673064                  | MK673034   | MK673004    | MK672951    | MK672980    |
| <i>Cytospora xinjiangensis</i> | CFCC 53183 <sup>T</sup>     | MK673065                  | MK673035   | MK673005    | MK672952    | MK672981    |
| <i>Cytospora xinglongensis</i> | CFCC 52458                  | MK432622                  | MK442946   | MK578082    | NA          | NA          |
| <i>Cytospora xinglongensis</i> | CFCC 52459                  | MK432623                  | MK442947   | MK578083    | NA          | NA          |
| <i>Cytospora xylocarpi</i>     | MFLUCC 17-0251 <sup>T</sup> | MG975775                  | MH253458   | MH253462    | NA          | NA          |
| <i>Cytospora zhaitangensis</i> | CFCC 56227 <sup>T</sup>     | OQ344750                  | OQ410623   | OQ398733    | OQ398760    | OQ398789    |
| <i>Cytospora zhaitangensis</i> | CFCC 57537                  | OQ344751                  | OQ410624   | OQ398734    | OQ398761    | OQ398790    |
| <i>Diaporthe vaccinii</i>      | CBS 160.32                  | KC343228                  | JQ807297   | NA          | KC343954    | KC344196    |

Ex-type strains are indicated with (T) after the collection number; "NA" indicates unavailable sequences.
